# Supplementary material for: Effects of gene dosage on cognitive ability: A function-based association study across brain and non-brain processes
Source: PubMed Central journal article supplement — Cell Genom. 2024 Dec 11;4(12):100721. doi: 10.1016/j.xgen.2024.100721 (PMC11701252; doi:10.1016/j.xgen.2024.100721), 2024-12-11
Supplement: mmc1.pdf [file mmc1.pdf]

## Supplemental information

**Effects of gene dosage on cognitive ability:**

**A function-based association study**

**across brain and non-brain processes**

**Guillaume Huguet, Thomas Renne, Cécile Poulain, Alma Dubuc, Kuldeep Kumar, Sayeh Kazem, Worrawat Engchuan, Omar Shanta, Elise Douard, Catherine Proulx, Martineau Jean-Louis, Zohra Saci, Josephine Mollon, Laura M. Schultz, Emma E.M. Knowles, Simon R. Cox, David Porteous, Gail Davies, Paul Redmond, Sarah E. Harris, Gunter Schumann, Guillaume Dumas, Aurélie Labbe, Zdenka Pausova, Tomas Paus, Stephen W. Scherer, Jonathan Sebat, Laura Almasy, David C. Glahn, and Sébastien Jacquemont**

# Supplementary data : Effects of gene dosage on cognitive ability: A function-based association study across brain and non-brain processes

## List of supplementary tables and figures:

|                                                                                                                                         |          |
|-----------------------------------------------------------------------------------------------------------------------------------------|----------|
| <b>Supplementary tables</b>                                                                                                             | <b>2</b> |
| Table S6. Cohort descriptions, Related to Table 1.                                                                                      | 2        |
| Table S7. Descriptions of cognitive ability used in UKBB, Related to STAR Methods.                                                      | 3        |
| Table S8. Descriptions of Gene-sets, Related to STAR Methods.                                                                           | 3        |
| <b>Supplementary figures</b>                                                                                                            | <b>4</b> |
| Figure S1: 36 duplications of the 2q12.3 observed in General Population, Related to Figure 1F.                                          | 4        |
| Figure S2: Correlation on cognitive ability of LOEUF categories, Related to Figure 2.                                                   | 5        |
| Figure S3: Effect sizes of autosomal coding genes on general cognitive abilities based on their LOEUF values, Related to Figure 2.      | 6        |
| Figure S4: Sensitivity analysis on cognitive ability for multiple HPA gene expression thresholds, Related to Figure 3.                  | 7        |
| Figure S5: Correlation on cognitive ability of cell type, Related to Figure 3.                                                          | 8        |
| Figure S6: Correlations on cognitive ability of multiple GTEx gene specificity thresholds, Related to Figure 4.                         | 9        |
| Figure S7: Comparisons of effect sizes for different gene-set associations, Related to Figure 4.                                        | 10       |
| Figure S8: Ridgeplots representing the LOEUF distribution across multiple levels of specificity, Related to Figure 4.                   | 11       |
| Figure S9: Effect sizes of Deletion and duplication on cognitive ability for SynGO gene-sets, Related to Figure 5.                      | 12       |
| Figure S10: Correlation on cognitive ability of SynGO, Related to Figure 5.                                                             | 13       |
| Figure S11: Network of GO-Terms associated with positive tagDS and negative impact on cognitive ability, Related to Figure 5.           | 14       |
| Figure S12: Network of GO-Terms associated with negative tagDS and negative impact on cognitive ability, Related to Figure 5.           | 15       |
| Figure S13: Comparison between Collins et al.'s haploinsufficiency, triplosensitive scores and tagDS, Related to Figure 5.              | 16       |
| Figure S14: Word-cloud plots on effects on cognitive ability of gene clustered, based on Gene ontology annotation, Related to Figure 5. | 17       |
| Figure S15: Description of cohorts in the dataset, Related to Table 1.                                                                  | 17       |

# Supplementary data : Effects of gene dosage on cognitive ability: A function-based association study across brain and non-brain processes

## Supplementary tables

| Cohort                 | Array type   | N=              | Ancestry |        | Gender |       | Age (year) |        | Z-scored intelligence measure (adj) |                                                                                 |                                 | Cognitive ability assessments   |                                                                              |
|------------------------|--------------|-----------------|----------|--------|--------|-------|------------|--------|-------------------------------------|---------------------------------------------------------------------------------|---------------------------------|---------------------------------|------------------------------------------------------------------------------|
|                        |              |                 | EUR      | Others | F      | M     | Mean       | SD     | Mean                                | SD                                                                              | Variables                       |                                 |                                                                              |
| Unselected (n=258,292) | CaG          | GSA             | 2074     | 1982   | 92     | 1094  | 980        | 54.317 | 7.601                               | 0.107                                                                           | 0.973                           | Age, Age <sup>2</sup> , sex, PC | g-factor, Reasoning, Memory, Reaction time                                   |
|                        |              | Omni2.5         | 515      | 490    | 25     | 281   | 234        | 52.437 | 8.602                               | -0.009                                                                          | 0.956                           |                                 |                                                                              |
|                        |              | GSA + Omni2.5   | 2589     | 2472   | 117    | 1375  | 1214       | 53.943 | 7.845                               | 0.084                                                                           | 0.970                           |                                 |                                                                              |
|                        | G-Scot       | 610Kq           | 13715    | 13672  | 43     | 8081  | 5634       | 46.730 | 14.996                              | 0.050                                                                           | 0.974                           | Age, Age <sup>2</sup> , sex, PC | g-factor, Logical Memory, Digit Symbol, Verbal fluency, Mill Hill Vocabulary |
|                        | Imagen       | 610Kq; 660Wq    | 1744     | 1624   | 120    | 891   | 853        | 14.450 | 0.366                               | 0.441                                                                           | 0.977                           | PC                              | WISC-IV                                                                      |
|                        | LBC1936      | 610Kq           | 503      | 500    | 3      | 246   | 257        | 69.825 | 0.829                               | 0.047                                                                           | 0.946                           | PC                              | Moray House Test                                                             |
|                        | SYS children | 610Kq           | 559      | 557    | 2      | 298   | 261        | 15.058 | 1.894                               | 0.361                                                                           | 0.882                           | PC                              | WISC-III                                                                     |
|                        |              | HOE-12V         | 408      | 408    | 0      | 207   | 201        | 14.906 | 1.760                               | 0.212                                                                           | 0.848                           |                                 |                                                                              |
|                        |              | 610Kq + HOE-12V | 967      | 965    | 2      | 505   | 462        | 14.994 | 1.839                               | 0.298                                                                           | 0.871                           |                                 |                                                                              |
|                        | SYS parents  | HOE-12V         | 598      | 596    | 2      | 319   | 279        | 49.495 | 4.868                               | -0.021                                                                          | 0.934                           | Age, Age <sup>2</sup> , sex, PC | g-factor, 12 cognitive measures‡                                             |
| UKBB                   | Affymetrix   | 73882           | 71364    | 2518   | 39317  | 34565 | 60.022     | 8.959  | 0.131                               | 0.964                                                                           | Age, Age <sup>2</sup> , sex, PC | g-factor <sup>47</sup>          |                                                                              |
|                        |              | 62080           | 60484    | 1596   | 34335  | 27745 | 62.083     | 7.663  | 0.131                               | 0.926                                                                           |                                 | g-factor (online)               |                                                                              |
|                        |              | 88441           | 80427    | 8014   | 47789  | 40652 | 58.139     | 8.304  | -0.035                              | 0.961                                                                           |                                 | FI                              |                                                                              |
|                        |              | 13773           | 13458    | 315    | 8284   | 5489  | 64.185     | 7.685  | -0.090                              | 0.970                                                                           |                                 | FI (online)                     |                                                                              |
| Autism (n=6,111)       | SPARK        | GSA             | 2543     | 1984   | 559    | 540   | 2003       | 12.359 | 6.190                               | -0.626                                                                          | 1.963                           | PC                              | IQ                                                                           |
|                        | MSSNG        | WGS             | 1007     | 768    | 239    | 202   | 805        | 9.503* | 4.600*                              | -0.529                                                                          | 1.590                           | PC                              | IQ                                                                           |
|                        | SSC          | 1Mv1            | 332      | 279    | 53     | 44    | 288        | 9.538  | 3.240                               | -0.602                                                                          | 1.558                           | PC                              | WISC-IV n=19; DAS-II E-Y n=96; DAS-II S-A n=179; Mullen n=12; WASI-I n=26    |
|                        |              | 1Mv3            | 1181     | 915    | 266    | 156   | 1025       | 8.769  | 3.523                               | -0.982                                                                          | 1.638                           |                                 | WISC-IV n=16; DAS-II E-Y n=530; DAS-II S-A n=539; Mullen n=77; WASI-I n=19   |
|                        |              | Omni2.5         | 1048     | 786    | 262    | 140   | 908        | 9.160  | 3.712                               | -1.227                                                                          | 1.834                           |                                 | WISC-IV n=10; DAS-II E-Y n=403; DAS-II S-A n=494; Mullen n=124; WASI-I n=17  |
| 1Mv1 + 1Mv3 + Omni2.5  | 2561         | 1980            | 581      | 340    | 2221   | 9.028 | 3.576      | -1.033 | 1.722                               | WISC-IV n=45; DAS-II E-Y n=1,029; DAS-II S-A n=1,212; Mullen n=213; WASI-I n=62 |                                 |                                 |                                                                              |

Table S6. Cohort descriptions, Related to Table 1.

Cohorts include 264,403 individuals, including 258,292 general populations. †63 and ‡ 12 cognitive measures were respectively used to compute the g-factor in SYS children and parents (Huguet et al 2021). SYS: Saguenay Youth Study, CaG: CARTaGEN, LBC1936: Lothian Birth Cohort 1936, SSC: Simons Simplex Collection; n=number of individuals remaining for analysis after quality control. The mean and Standard Deviation (SD) for FI and g-factor slightly deviate from 0 and 1 in some cohorts since they were computed on all available data (before the exclusion of some individuals for poor quality array) and summarized here only for individuals included in the analyses. \* The MSSNG cohort gave participants years but for not all, for 280 age was missing.

**Supplementary data : Effects of gene dosage on cognitive ability: A function-based association study across brain and non-brain processes**

| Field name                                                     | Clinic value |                                | Online value |                |
|----------------------------------------------------------------|--------------|--------------------------------|--------------|----------------|
|                                                                | code         | Lyall et al 2016 <sup>47</sup> | code         | Gfact 5 Online |
| <b>Fluid intelligence score</b>                                | 20016        | use                            | 20191        | use            |
| <b>Trail making #2</b>                                         | 6350         | -                              | 20157        | use            |
| <b>Symbol digit substitution</b>                               | 23324        | -                              | 20159        | use            |
| <b>Pairs matching</b>                                          | 399          | use                            | 20132        | use            |
| <b>Numeric memory</b>                                          | 4282         | use                            | 20240        | use            |
| <b>Prospective memory</b>                                      | 20018        | use                            | -            | -              |
| <b>Mean time to correctly identify matches (Reaction time)</b> | 20023        | use                            | -            | -              |

Table S7. Descriptions of cognitive ability used in UKBB, Related to STAR Methods.

| Name                        | HPA           |             |               |             | GTEx          |             |               |             | Cell types | SynGO | LOEUF catg. | GO-term |
|-----------------------------|---------------|-------------|---------------|-------------|---------------|-------------|---------------|-------------|------------|-------|-------------|---------|
|                             | SD $\geq$ 0.5 | SD $\geq$ 1 | SD $\geq$ 1.5 | SD $\geq$ 2 | SD $\geq$ 0.5 | SD $\geq$ 1 | SD $\geq$ 1.5 | SD $\geq$ 2 |            |       |             |         |
| <b>N lists</b>              | 215           | 215         | 215           | 215         | 37            | 37          | 37            | 37          | 29         | 85    | 38          | 6,130   |
| <b>Mean list size</b>       | 3,817         | 1,975       | 1,017         | 571         | 3,056         | 2,015       | 1,173         | 787         | 890        | 120   | 1,423       | 89      |
| <b>N unique coding gene</b> | 12,710        | 12,706      | 12,449        | 12,427      | 12,755        | 12,758      | 12,751        | 12,538      | 8,422      | 921   | 13,288      | 11,460  |

Table S8. Descriptions of Gene-sets, Related to STAR Methods.

# Supplementary data : Effects of gene dosage on cognitive ability: A function-based association study across brain and non-brain processes

## Supplementary figures

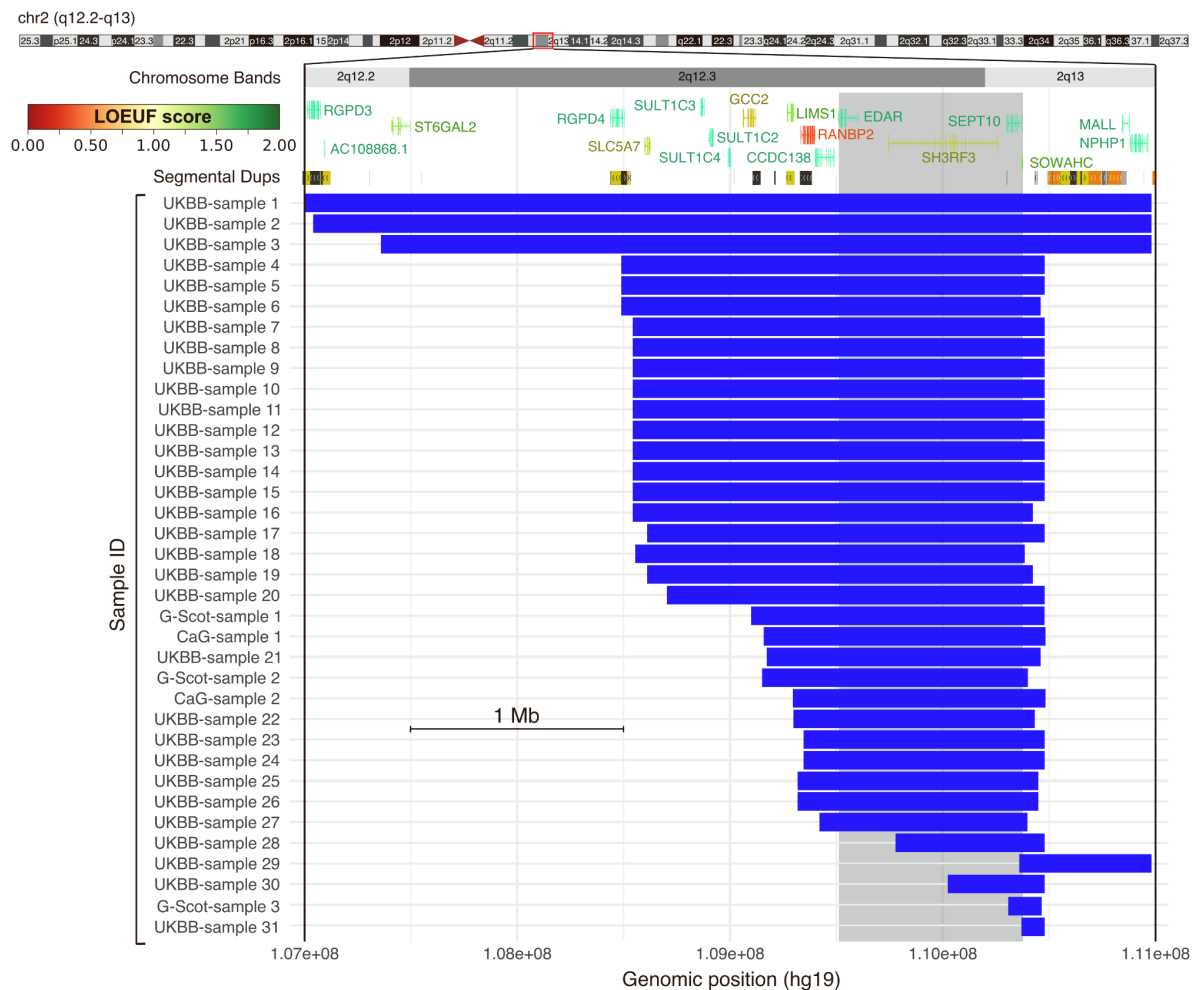

Figure S1: 36 duplications of the 2q12.3 observed in General Population, Related to Figure 1F.

This figure depicted genomic duplications (blue) occurring on chromosome 2 and overlapping with at least one of these genes: *EDAR*, *SH3RF3*, *SEPT10*, *SOWAHC*, in the general population. The x-axis represented the genomic coordinates (hg19), and the y-axis listed the carriers' sample IDs. Three genomic annotations were included: chromosome bands; genes with their associated LOEUF scores; segmental duplications. LOEUF scores indicated the level of tolerance to loss-of-function for each gene, ranging from red (intolerant) to green (tolerant).

## Supplementary data : Effects of gene dosage on cognitive ability: A function-based association study across brain and non-brain processes

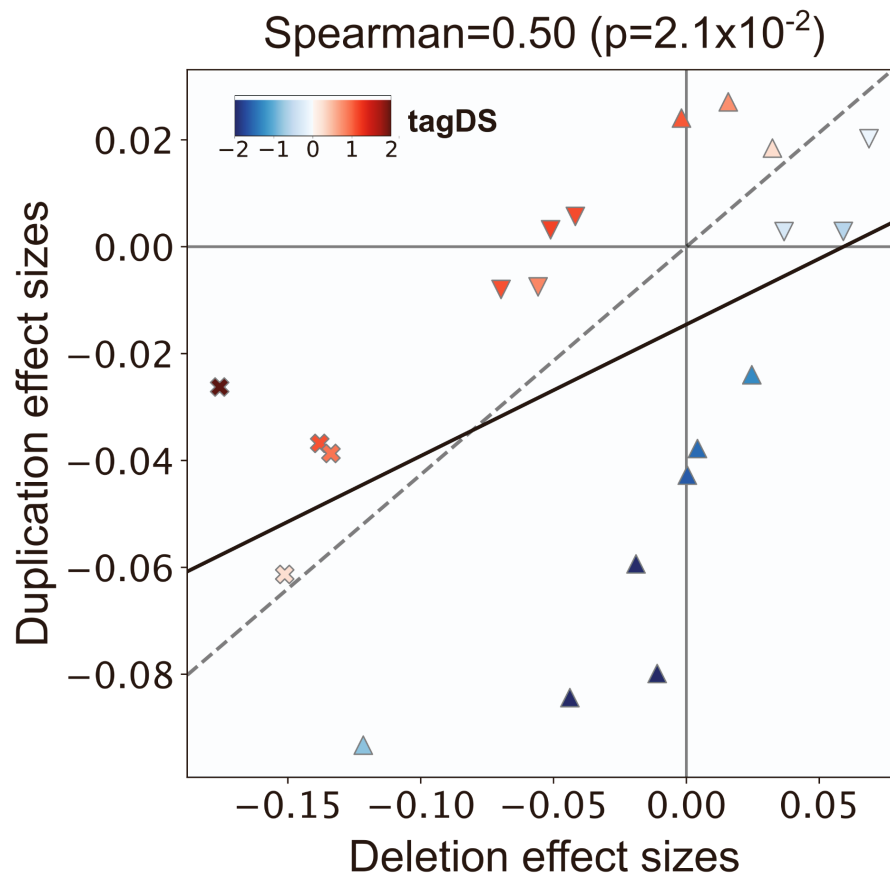

## Supplementary data : Effects of gene dosage on cognitive ability: A function-based association study across brain and non-brain processes

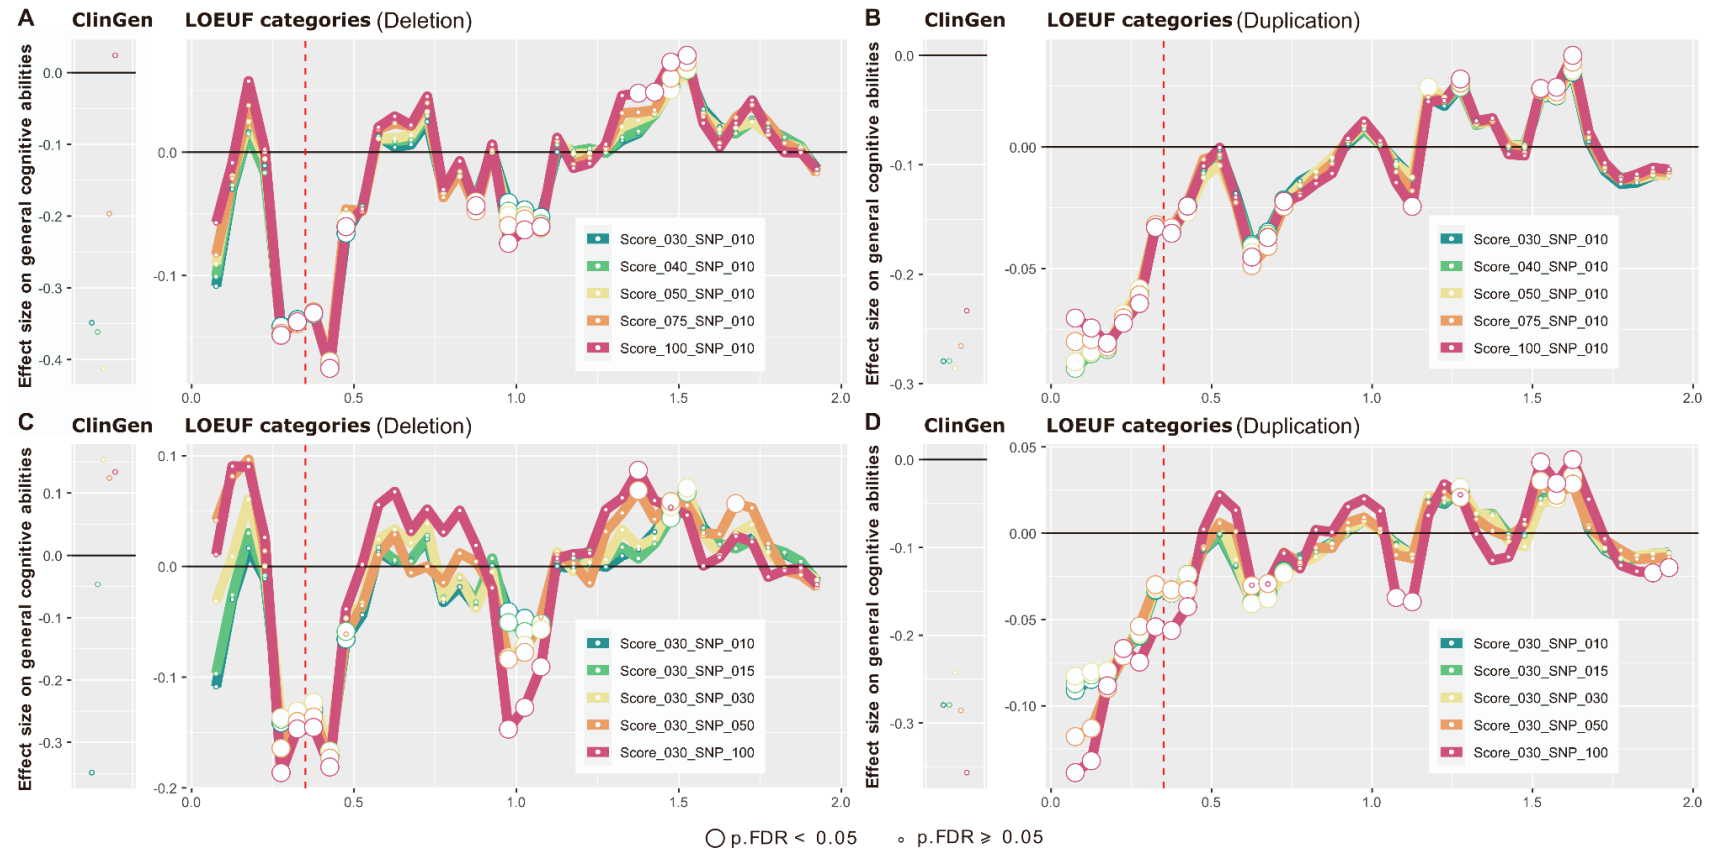

**Figure S3: Effect sizes of autosomal coding genes on general cognitive abilities based on their LOEUF values, Related to Figure 2.** Sliding window estimating the effect size on cognitive ability of deletions (left) and duplications (right) for 38 LOEUF categories and definitive ID-genes curated by ClinGen (based on model 2). The line represents the estimated effect size of 38 categories of genes based on their LOEUF values in the model. Estimates were computed using a pooled dataset, large circles indicated significant p-values adjusted by FDR and small one for non-significant. We ran sensitivity analyses based on different CNV cut-offs of quality controls with the likelihood score ( $\text{Score} \geq 30, 40, 50, 75$  and  $100$  and a fixed number of SNPs  $\geq 10$ ; for A and B) and numbers of SNPs inside CNV (SNPs  $\geq 10, 15, 30, 50$  and  $100$  and a fixed likelihood score  $\geq 30$ ; C and D).

## Supplementary data : Effects of gene dosage on cognitive ability: A function-based association study across brain and non-brain processes

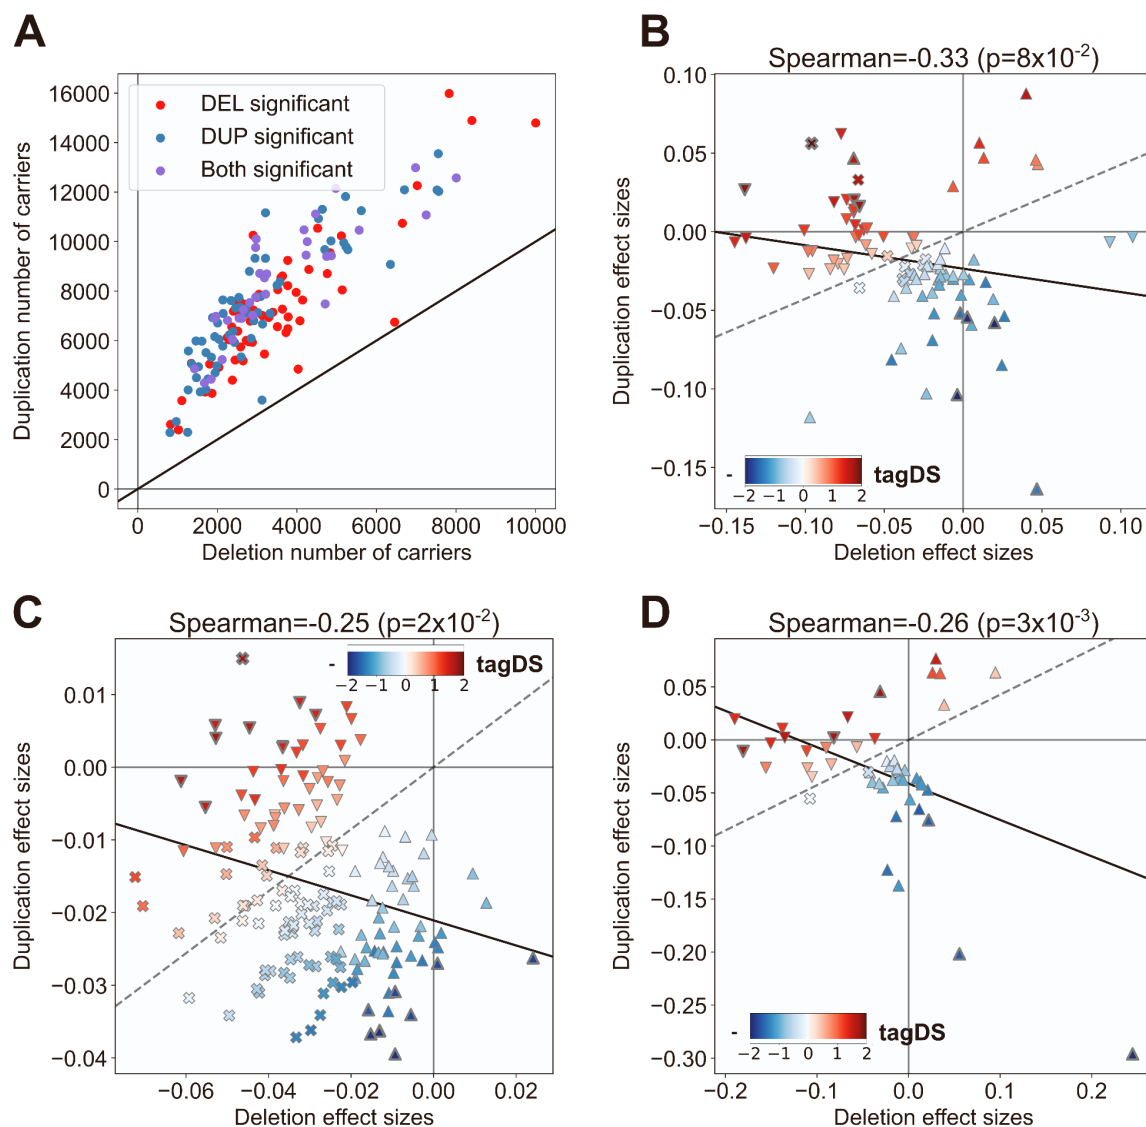

**Figure S4: Sensitivity analysis on cognitive ability for multiple HPA gene expression thresholds, Related to Figure 3.**

(A) Number of deletion and duplication carriers of genes for the 215 gene-sets analyzed in Figure 3. The black line represents the theoretical perfect concordance between Deletion and duplication carriers. Spearman correlations (black lines) between the effect sizes of deletions and duplications of tissue gene-sets with a normalized expression threshold  $>0.5SD$  (B),  $>1.5SD$  (C), and  $>2SD$  (D). FDR significant effects on cognitive ability for deletions (downward triangle), duplications (upward triangle), or both (cross). p-values obtained from permutation tests to account for the partial overlap between gene sets. Gene sets are color coded based on their tagDS. The dash line represents the average exome-wide duplication/deletion effect-sizes ratio.



## Supplementary data : Effects of gene dosage on cognitive ability: A function-based association study across brain and non-brain processes

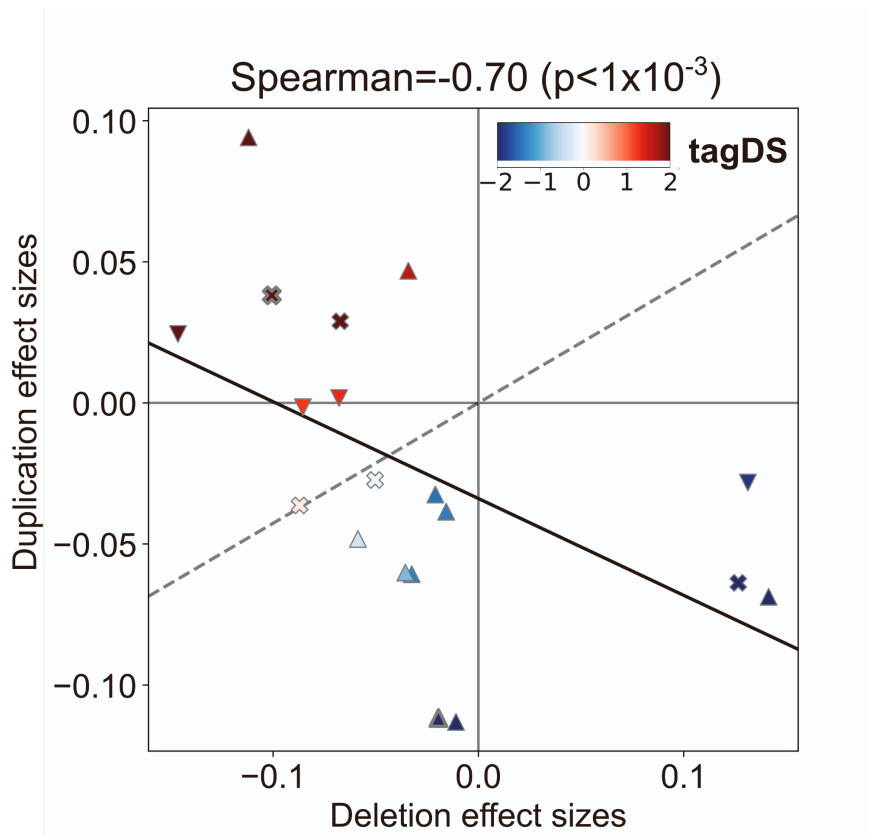

Figure S5: Correlation on cognitive ability of cell type, Related to Figure 3.

Spearman correlation (black line) between the effect sizes of deletions and duplications of gene-sets with FDR significant effects on cognitive ability for deletions (downward triangle), duplications (upward triangle), or both (cross). p-values obtained from permutation tests to account for the partial overlap between gene sets. Gene sets are color coded based on their tagDS. The dash line represents the average exon-wide duplication/deletion effect-sizes ratio.

## Supplementary data : Effects of gene dosage on cognitive ability: A function-based association study across brain and non-brain processes

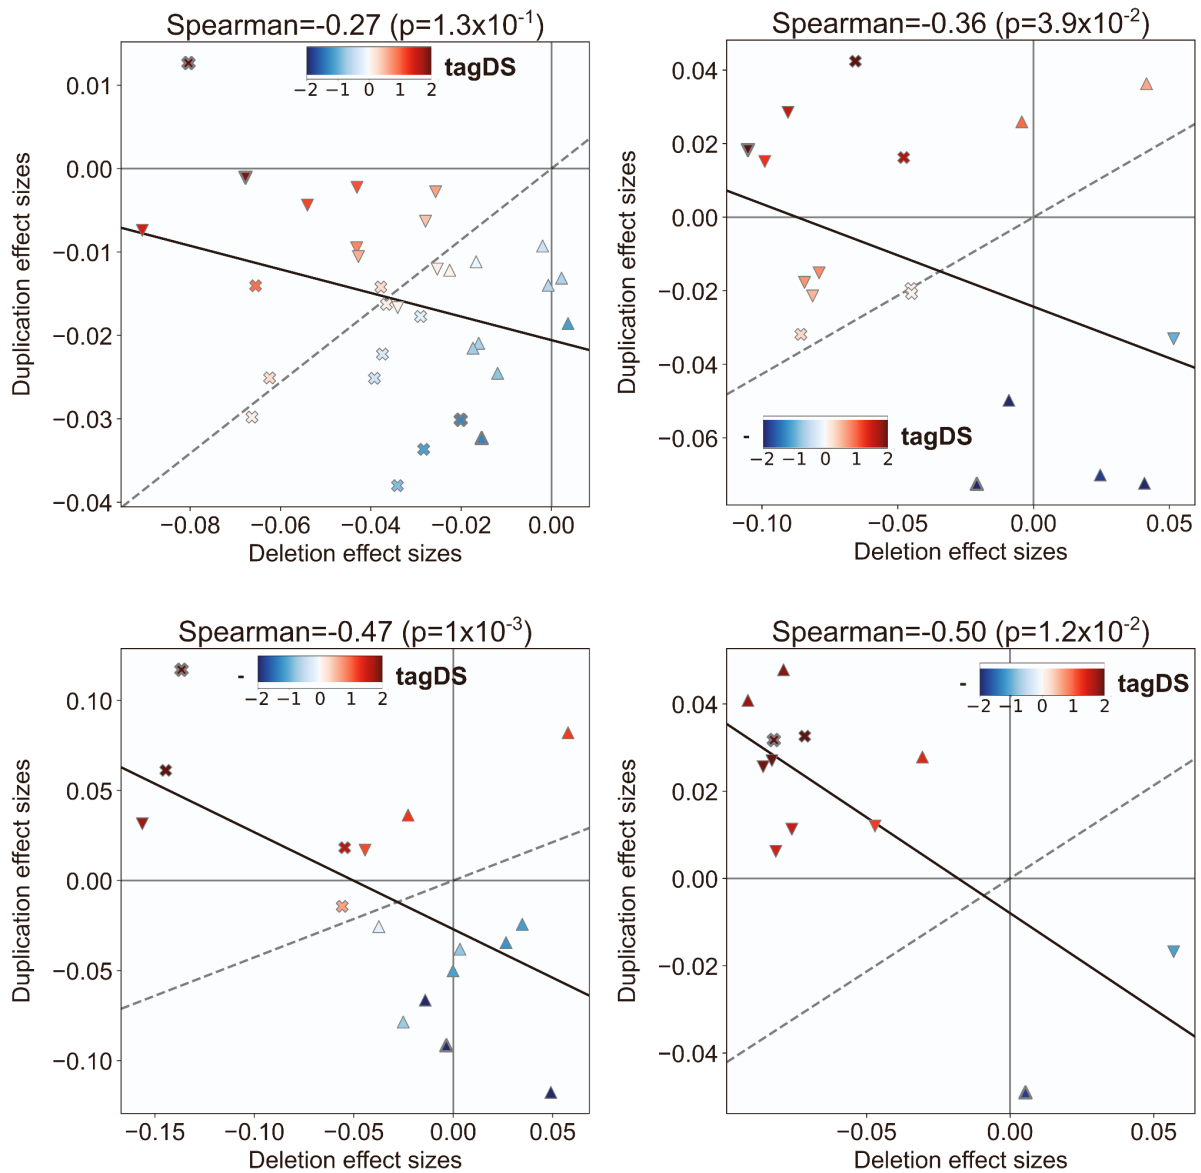

Figure S6: Correlations on cognitive ability of multiple GTEx gene specificity thresholds, Related to Figure 4.

Spearman correlations (black lines) between the effect sizes of deletions and duplications of tissue gene-sets with a normalized relative expression threshold  $>0.5SD$  (A),  $>1.5SD$  (B),  $>2SD$  (C) and  $>1SD$  without low-tissue-specificity genes (D). FDR significant effects on cognitive ability for deletions (downward triangle), duplications (upward triangle), or both (cross). p-values obtained from permutation tests to account for the partial overlap between gene sets. Gene sets are color coded based on their tagDS. The dash line represents the average exome-wide duplication/deletion effect-sizes ratio.

# Supplementary data : Effects of gene dosage on cognitive ability: A function-based association study across brain and non-brain processes

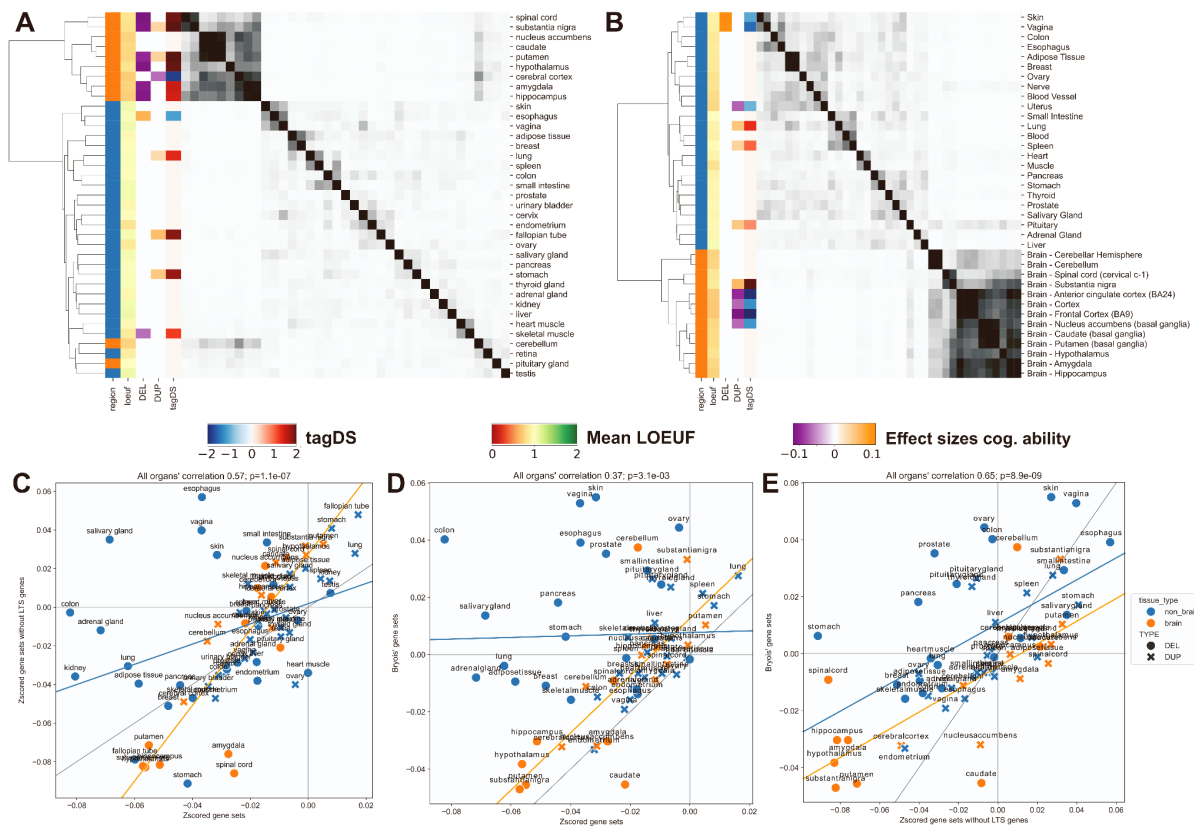

**Figure S7: Comparisons of effect sizes for different gene-set associations, Related to Figure 4.**

Clustering of gene-sets computed with z-score minus 8,194 low-tissue-specificity genes (A) and computed with TDEP (Bryois et al) (B). Orange represents brain tissues and blue non-brain tissues. Gene-set overlap matrix show high overlap between brain gene-sets and much lower overlap across non-brain tissues for both association methods. 2nd columns represent the average LOEUF score of the gene-set. 3rd and 4th columns represent the effect of gene-sets on cognitive ability when deleted and duplicated, respectively. The 5th column is the resulting tagDS. Correlation of effect-sizes for multiple gene-set definitions, z-scored gene-sets with all coding genes versus z-scored gene-sets without low-tissue-specificity genes (C), z-scored gene-sets with all coding genes versus TDEP gene-sets (D) and z-scored gene-sets without low-tissue-specificity genes versus TDEP gene-sets (E). Orange lines show the Spearman correlation between brain gene-sets ( $r=0.84$   $p=1 \times 10^{-6}$ ;  $r=0.82$   $p=9 \times 10^{-6}$ ;  $r=0.76$   $p=1 \times 10^{-4}$  for B, C and D respectively) and blue lines show correlation for non-brain gene-sets ( $r=0.47$   $p=4 \times 10^{-4}$ ;  $r=0.16$   $p=3 \times 10^{-1}$ ;  $r=0.58$   $p=4 \times 10^{-5}$  for B, C and D respectively). The grey line represents a theoretical perfect concordance between estimates. P-values are nominal values without permutation tests.

## Supplementary data : Effects of gene dosage on cognitive ability: A function-based association study across brain and non-brain processes

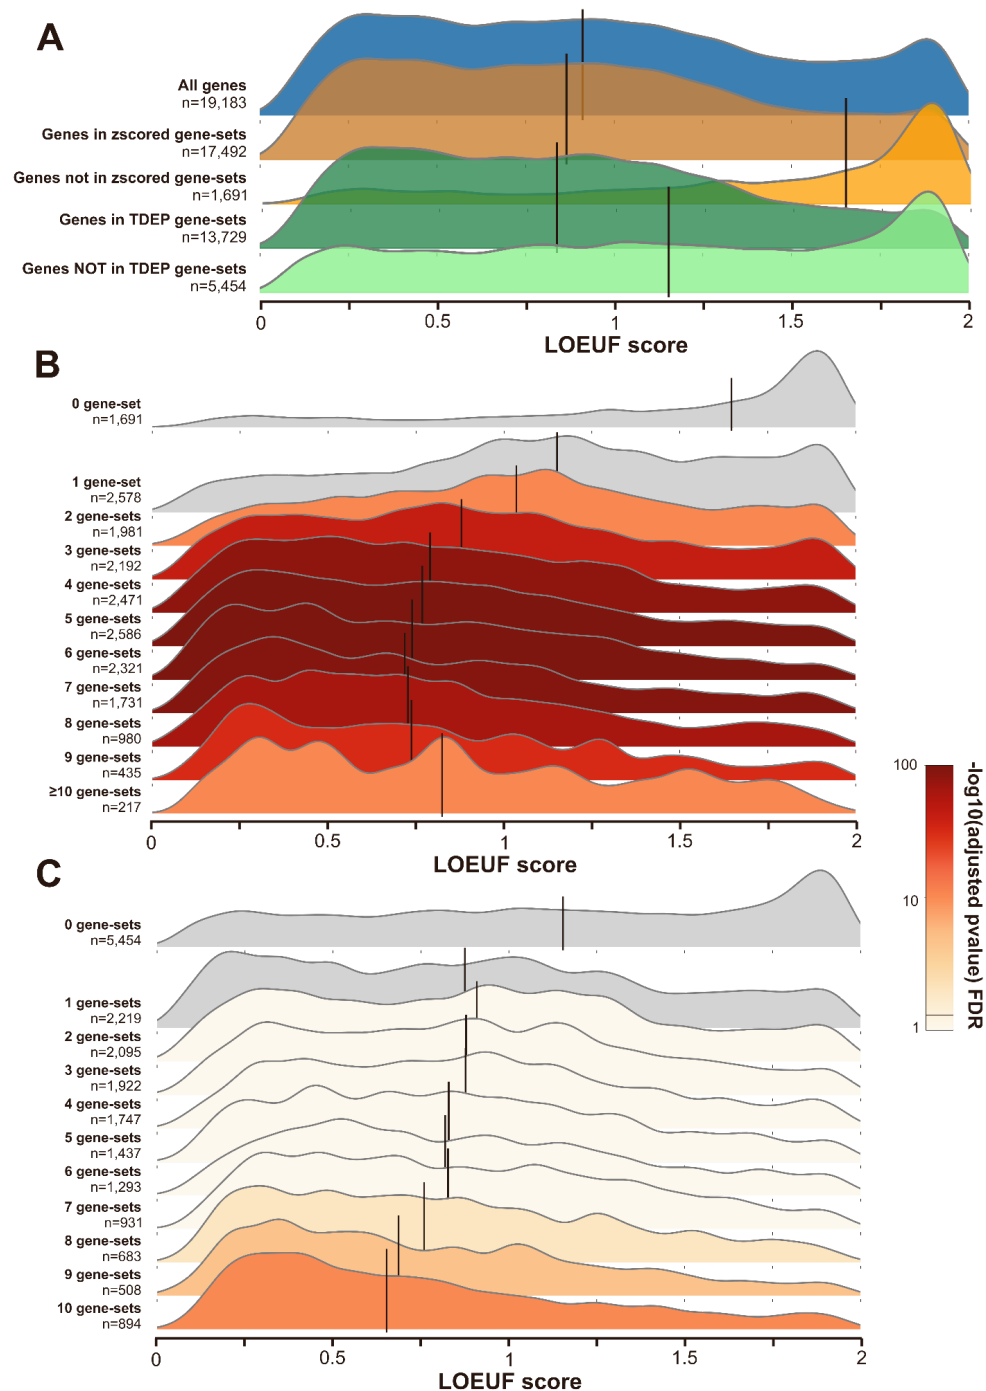

Figure S8: Ridgeplots representing the LOEUF distribution across multiple levels of specificity, Related to Figure 4.

(A) Distribution of LOEUF values for the whole coding exome, for genes assigned to at least one GTEx gene-set defined by z-score, for genes not assigned to any GTEx tissue (Z-score), for genes assigned to at least one GTEx tissue defined by TDEP and for genes not assigned to any GTEx gene-set (TDEP). Distribution of LOEUF for genes present in one or multiple gene-sets defined by Z-score (B) and TDEP (C) methods. The color represents the FDR-adjusted pvalue of the Mann-Whitney test between the distribution of LOEUF for specific genes (present in only one gene-set) and the distribution of interest. Black line represents the median LOEUF score for each category.

## Supplementary data : Effects of gene dosage on cognitive ability: A function-based association study across brain and non-brain processes

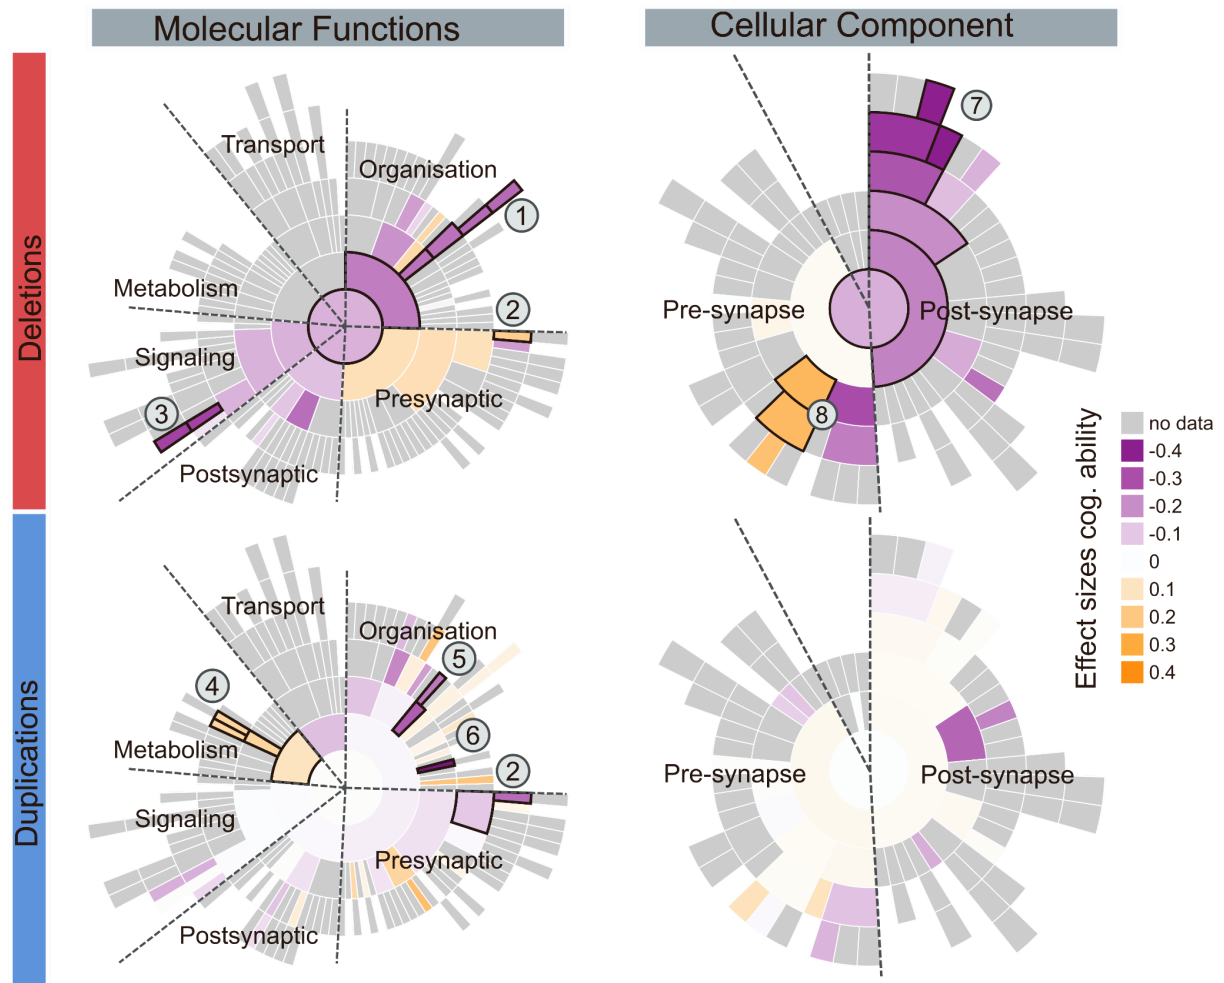

Figure S9: Effect sizes of Deletion and duplication on cognitive ability for SynGO gene-sets, Related to Figure 5.

Effect sizes of synaptic molecular functions and cellular component gene-sets as defined by SynGO<sup>48</sup> on cognitive ability. Purple and orange represent negative and positive effect size on cognitive ability, respectively. Ontologies with black edges indicate significant effects (FDR). The results are shown only for SynGO terms with more than 10 genes, observed at least 30 times in our dataset, and with a coverage greater than 20%. Note: 1) Regulation of modification of postsynaptic actin cytoskeleton, 2) Regulation of calcium-dependent activation of synaptic vesicle fusion, 3) Presynaptic modulation of chemical synaptic transmission, 4) translation at synapse, 5) regulation of postsynapse organization, 6) synapse adhesion between pre- and post-synapse, 7) Integral component of postsynaptic density membrane, 8) Synaptic vesicle membrane.

## Supplementary data : Effects of gene dosage on cognitive ability: A function-based association study across brain and non-brain processes

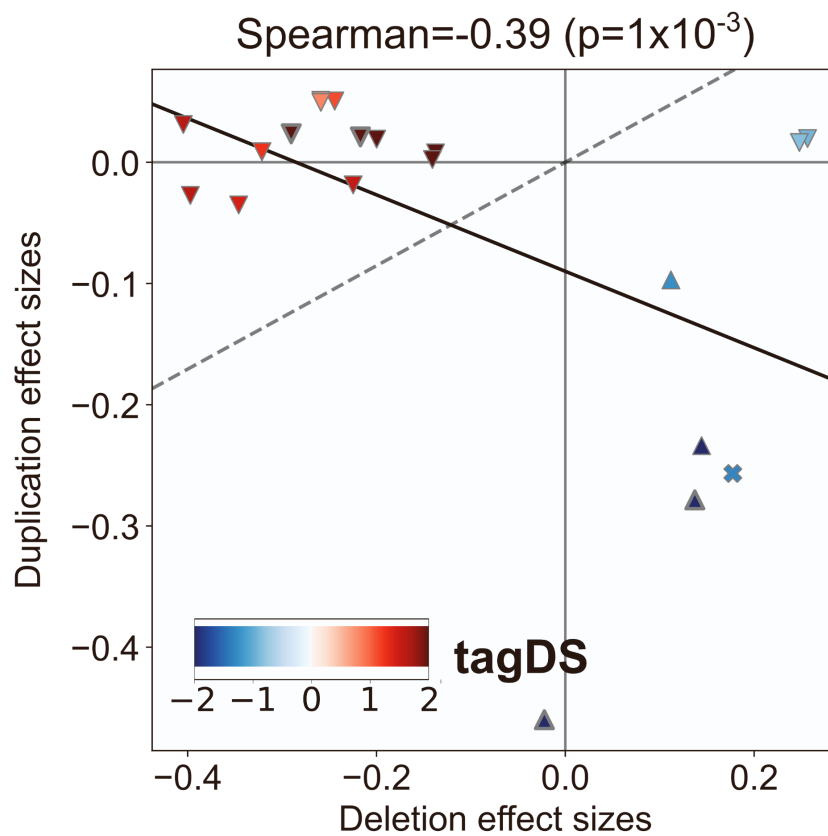

Figure S10: Correlation on cognitive ability of SynGO, Related to Figure 5.

Spearman correlations between the effect sizes of deletions and duplications of gene-sets with FDR significant effects on cognitive ability for deletions (downward triangle), duplications (upward triangle), or both (cross). p-values obtained from permutations to account for the partial overlap between gene sets. Gene sets are color coded based on their tagDS.

## Supplementary data : Effects of gene dosage on cognitive ability: A function-based association study across brain and non-brain processes

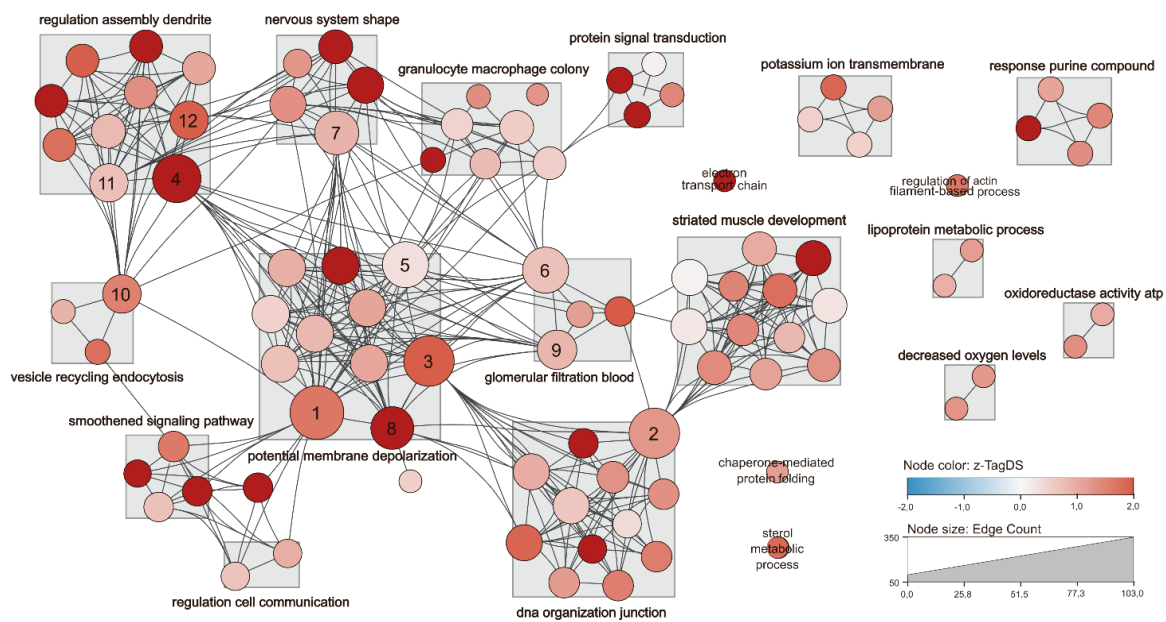

Figure S11: Network of GO-Terms associated with positive tagDS and negative impact on cognitive ability, Related to Figure 5.

This figure presents a ReviGo-generated<sup>49</sup> network of GOterms based on GOterm associated with negative impact on cognitive ability and positive tagDS. Each node symbolizes a specific GOterm or GOterm cluster (clustering by standard ReviGo criteria<sup>49</sup>). Node color denotes the tagDS value associated (red for positive tagDS). The node size of each node correlates with its edge count, reflecting the extent of its connectivity and relevance within the network. Larger nodes represent higher numbers of interactions with other GO-terms. Links between nodes depict the connection between GO-Terms. The bold text represents the supra-cluster defined by ReviGo<sup>49</sup>, represented by a grey square. Nodes had at least 15 edge counts: 1) positive regulation of excitatory postsynaptic potential; 2) axonogenesis; 3) regulation of cellular component size; 4) regulation of synapse organization; 5) positive regulation of vasoconstriction; 6) regulation of glomerular filtration; 7) regulation of cell shape; 8) cell volume homeostasis; 9) negative regulation of blood pressure; 10) positive regulation of endocytosis; 11) positive regulation of dendrite development; 12) regulation of dendrite development.



## Supplementary data : Effects of gene dosage on cognitive ability: A function-based association study across brain and non-brain processes

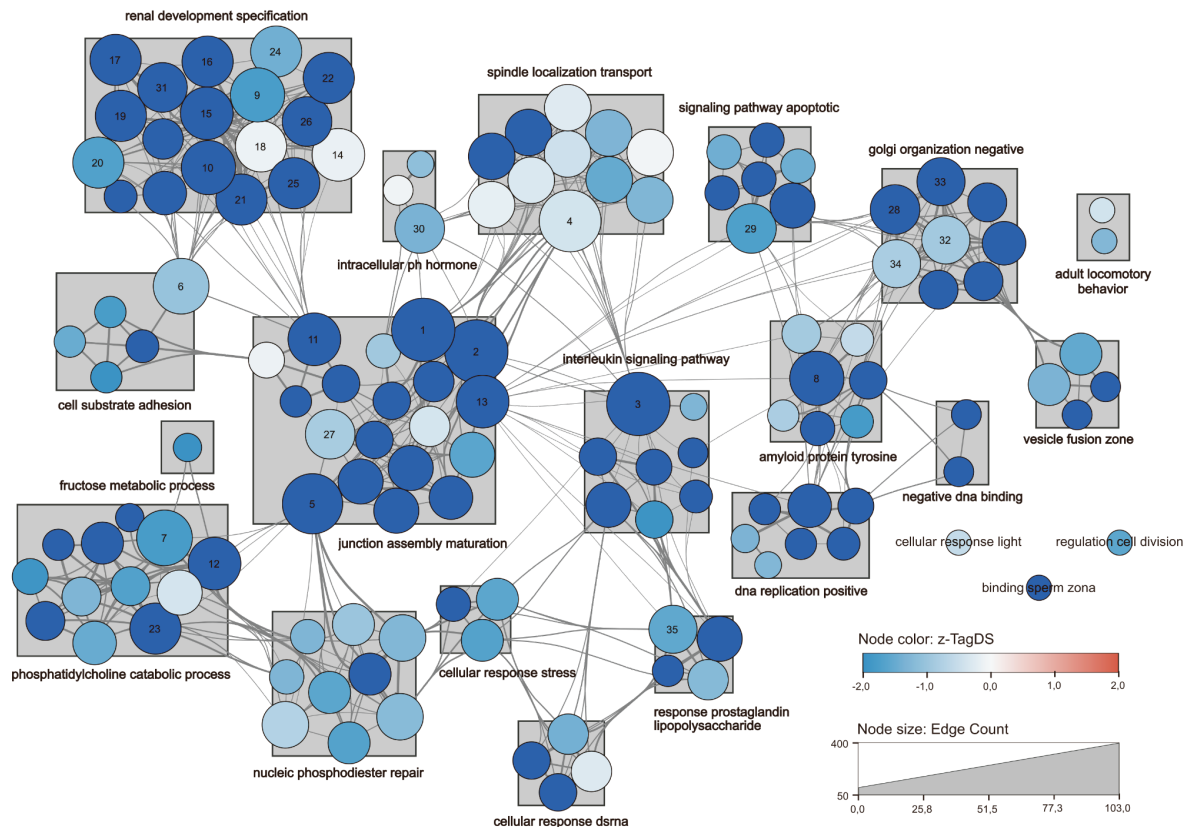

Figure S12: Network of GO-Terms associated with negative tagDS and negative impact on cognitive ability, Related to Figure 5.

This figure presents a ReviGo-generated<sup>49</sup> network of GOterms based on GOterm associated with negative impact on cognitive ability and negative tagDS. Each node symbolizes a specific GOterm or GOterm cluster (clustering by standard ReviGo criteria<sup>49</sup>). Node color denotes the tagDS value associated (blue for negative tagDS). The node size of each node correlates with its edge count, reflecting the extent of its connectivity and relevance within the network. Larger nodes represent higher numbers of interactions with other GO-terms. Links between nodes depict the connection between GO-Terms. The bold text represents the supra-cluster defined by ReviGO<sup>49</sup>, represented by a grey square. Nodes had at least 15 edge counts: 1) vesicle fusion; 2) phagolysosome assembly; 3) signal release; 4) establishment of spindle localization; 5) telomere maintenance; 6) neuron migration; 7) NAD metabolic process; 8) negative regulation of translation; 9) cardiocyte differentiation; 10) cardiac neural crest cell development involved in heart development; 11) synapse maturation; 12) nucleoside phosphate biosynthetic process; 13) mitotic G2/M transition checkpoint; 14) muscle tissue development; 15) formation of primary germ layer; 16) trachea development; 17) somite development; 18) skeletal muscle organ development; 19) segmentation; 20) renal tubule development; 21) embryonic pattern specification; 22) cerebellar cortex development; 23) ceramide biosynthetic process; 24) blastocyst formation; 25) axis specification; 26) trachea morphogenesis; 27) nuclear division; 28) negative regulation of cell projection organization; 29) negative regulation of apoptotic signaling pathway; 30) hormone transport; 31) anterior/posterior axis specification; 32) negative regulation of supramolecular fiber organization; 33) negative regulation of neuron projection development; 34) negative regulation of cytoskeleton organization; 35) lipopolysaccharide-mediated signaling pathway.



## Supplementary data : Effects of gene dosage on cognitive ability: A function-based association study across brain and non-brain processes

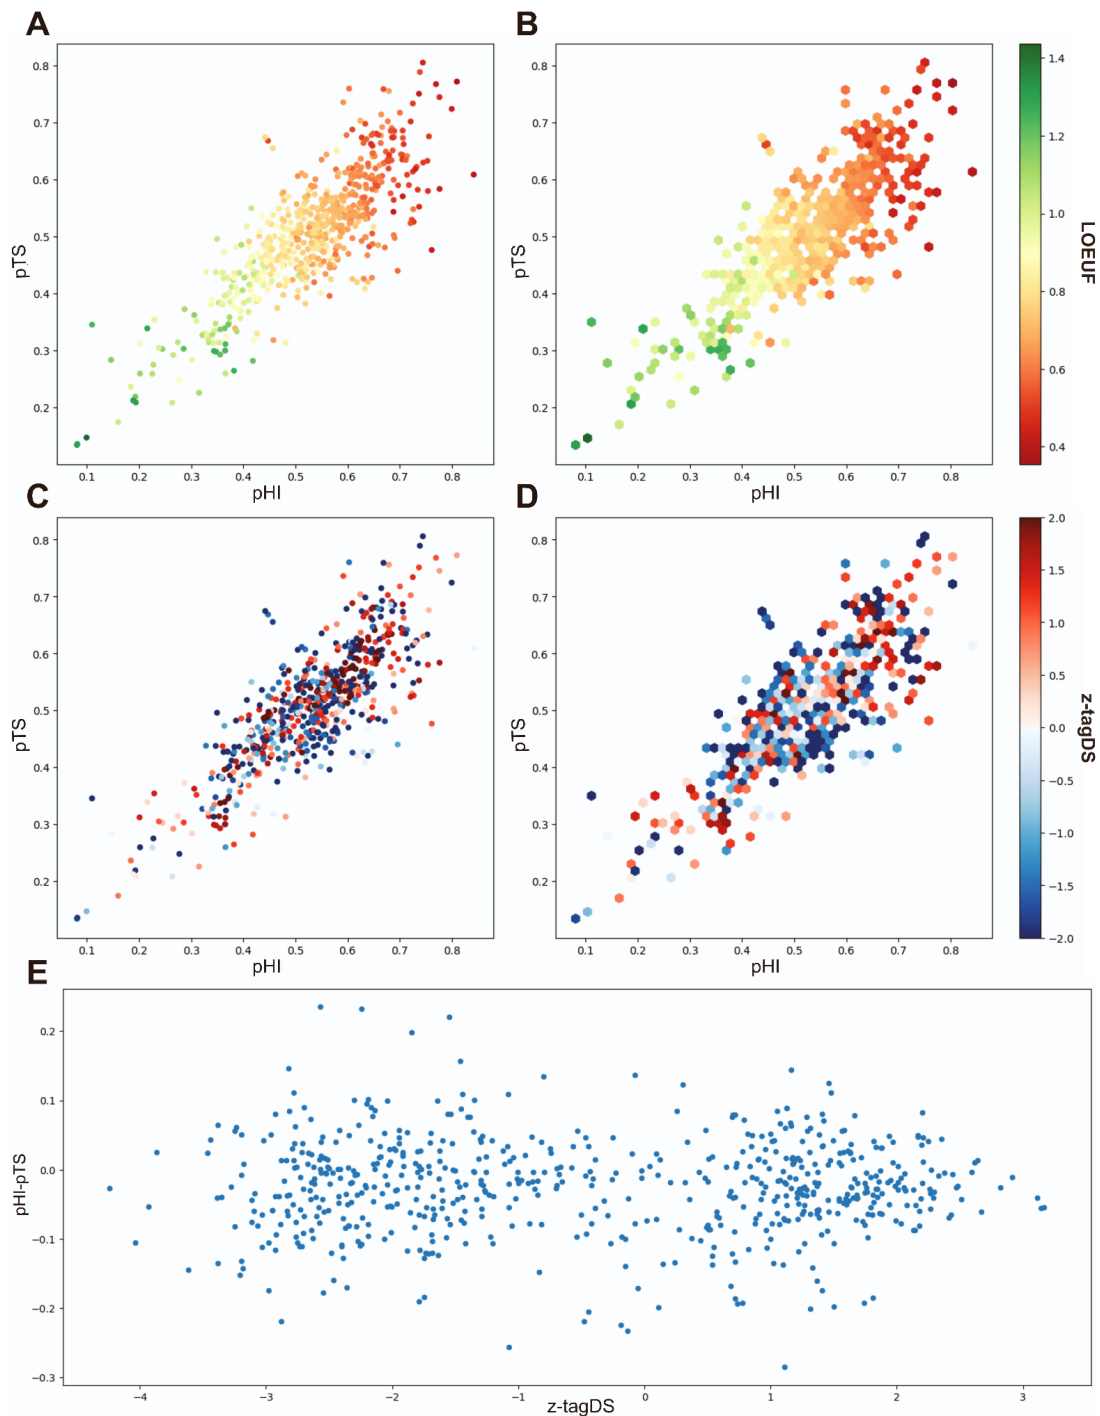

Figure S13: Comparison between Collins et al.'s haploinsufficiency, triplosensitive scores and tagDS, Related to Figure 5.

Scatter (A) and hexbin (B) plots of the distribution of mean pHI and pTS of genes coming from the 645 significant GO-terms. The color-code represent the average LOEUF value of GO-terms. Hexbin plots visualize the average between overlapping points. Scatter (C) and hexbin (D) plots representing again the distribution of mean pHI and pTS of genes coming from the 645 significant GO-terms. The color-code represent the z-tagDS value extract from Figure 6. (E) Comparison between gene dosage specificity for cognitive ability as describe by z-tagDS and gene dosage specificity based on pHI, pTS difference.

## Supplementary data : Effects of gene dosage on cognitive ability: A function-based association study across brain and non-brain processes

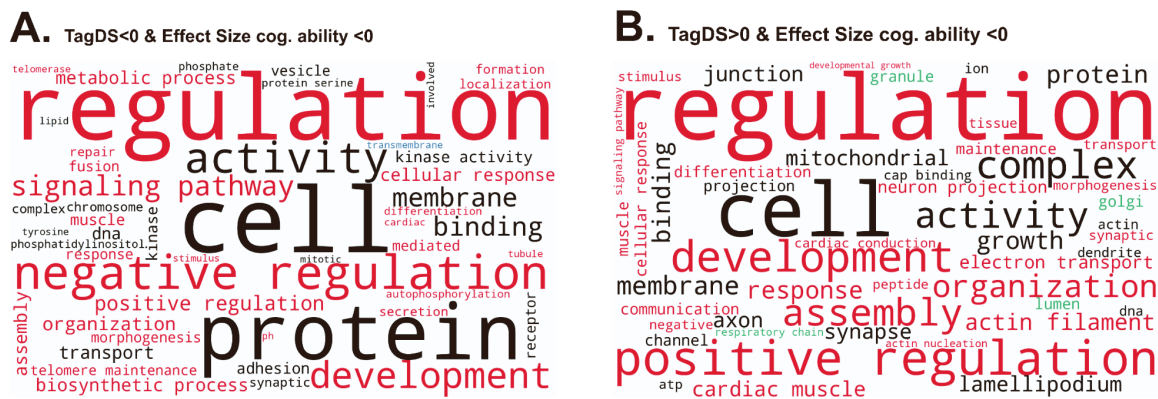

Figure S14: Word-cloud plots on effects on cognitive ability of gene clustered, based on Gene ontology annotation, Related to Figure 5.

Word-cloud plots (A) and (B) display the 50 most frequent words within GO-term names and having a negative effect on cognitive abilities, with negative ( $n_{GO-term} = 279$ ) and positive ( $n_{GO-term} = 242$ ) tagDS, respectively. Red, blue, and green words represent biological processes, molecular functions and cellular components terms, respectively. Black words are observed in multiple categories.

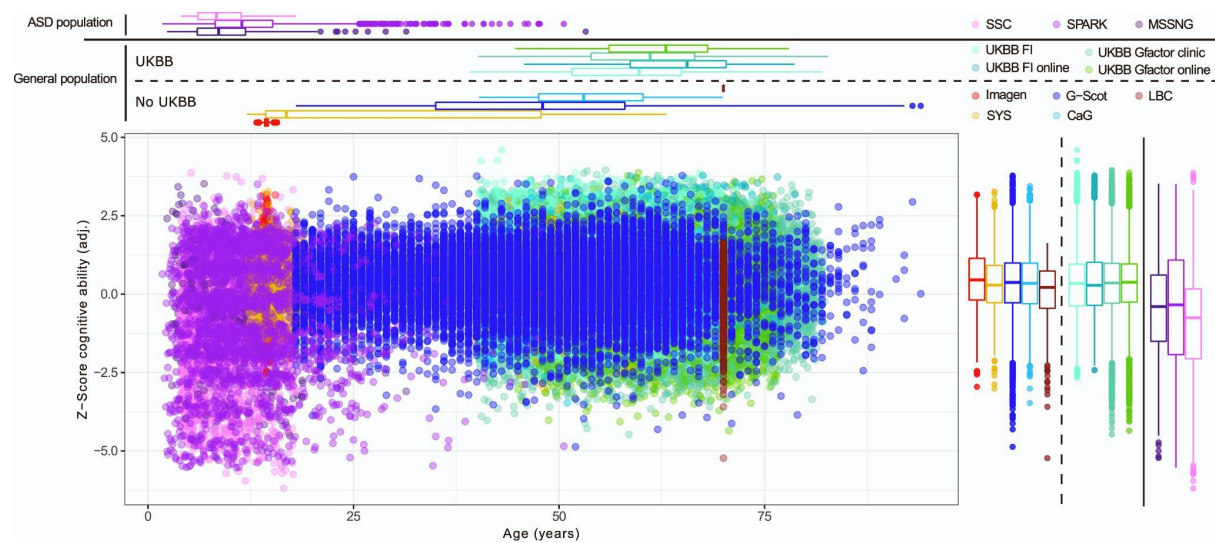

Figure S15: Description of cohorts in the dataset, Related to Table 1.

The figure showed the cognitive ability z-score adjusted (sex, age, PC1 to 10 and cognitive test) with age for each participant.

## Supplementary data : Effects of gene dosage on cognitive ability: A function-based association study across brain and non-brain processes

### Supplementary reference :

1. Naj, A.C., Beecham, G.W., Martin, E.R., Gallins, P.J., Powell, E.H., Konidari, I., Whitehead, P.L., Cai, G., Haroutunian, V., Scott, W.K., et al. (2010). Dementia revealed: novel chromosome 6 locus for late-onset Alzheimer disease provides genetic evidence for folate-pathway abnormalities. *PLoS Genet* 6, e1001130. <https://doi.org/10.1371/journal.pgen.1001130>.
2. Adhikari, K., Reales, G., Smith, A.J.P., Konka, E., Palmen, J., Quinto-Sanchez, M., Acuña-Alonzo, V., Jaramillo, C., Arias, W., Fuentes, M., et al. (2015). A genome-wide association study identifies multiple loci for variation in human ear morphology. *Nat Commun* 6, 7500. <https://doi.org/10.1038/ncomms8500>.
3. Goes, F.S., McGrath, J., Avramopoulos, D., Wolyniec, P., Pirooznia, M., Ruczinski, I., Nestadt, G., Kenny, E.E., Vacic, V., Peters, I., et al. (2015). Genome-wide association study of schizophrenia in Ashkenazi Jews. *Am J Med Genet B Neuropsychiatr Genet* 168, 649–659. <https://doi.org/10.1002/ajmg.b.32349>.
4. Adhikari, K., Fontanil, T., Cal, S., Mendoza-Revilla, J., Fuentes-Guajardo, M., Chacón-Duque, J.-C., Al-Saadi, F., Johansson, J.A., Quinto-Sanchez, M., Acuña-Alonzo, V., et al. (2016). A genome-wide association scan in admixed Latin Americans identifies loci influencing facial and scalp hair features. *Nat Commun* 7, 10815. <https://doi.org/10.1038/ncomms10815>.
5. Pickrell, J.K., Berisa, T., Liu, J.Z., Séguérel, L., Tung, J.Y., and Hinds, D.A. (2016). Detection and interpretation of shared genetic influences on 42 human traits. *Nat Genet* 48, 709–717. <https://doi.org/10.1038/ng.3570>.
6. Adhikari, K., Fuentes-Guajardo, M., Quinto-Sánchez, M., Mendoza-Revilla, J., Camilo Chacón-Duque, J., Acuña-Alonzo, V., Jaramillo, C., Arias, W., Lozano, R.B., Pérez, G.M., et al. (2016). A genome-wide association scan implicates DCHS2, RUNX2, GLI3, PAX1 and EDAR in human facial variation. *Nat Commun* 7, 11616. <https://doi.org/10.1038/ncomms11616>.
7. Wu, S., Tan, J., Yang, Y., Peng, Q., Zhang, M., Li, J., Lu, D., Liu, Y., Lou, H., Feng, Q., et al. (2016). Genome-wide scans reveal variants at EDAR predominantly affecting hair straightness in Han Chinese and Uyghur populations. *Hum Genet* 135, 1279–1286. <https://doi.org/10.1007/s00439-016-1718-y>.
8. Ahola-Olli, A.V., Würtz, P., Havulinna, A.S., Aalto, K., Pitkänen, N., Lehtimäki, T., Kähönen, M., Lyytikäinen, L.-P., Raitoharju, E., Seppälä, I., et al. (2017). Genome-wide Association Study Identifies 27 Loci Influencing Concentrations of Circulating Cytokines and Growth Factors. *Am J Hum Genet* 100, 40–50. <https://doi.org/10.1016/j.ajhg.2016.11.007>.
9. Chesi, A., Mitchell, J.A., Kalkwarf, H.J., Bradfield, J.P., Lappe, J.M., Cousminer, D.L., Roy, S.M., McCormack, S.E., Gilsanz, V., Oberfield, S.E., et al. (2017). A Genomewide Association Study Identifies Two Sex-Specific Loci, at SPTB and IZUMO3, Influencing Pediatric Bone Mineral Density at Multiple Skeletal Sites. *J Bone Miner Res* 32, 1274–1281. <https://doi.org/10.1002/jbmr.3097>.
10. Suhre, K., Arnold, M., Bhagwat, A.M., Cotton, R.J., Engelke, R., Raffler, J., Sarwath, H., Thareja, G., Wahl, A., DeLisle, R.K., et al. (2017). Connecting genetic risk to disease end points through the human blood plasma proteome. *Nat Commun* 8, 14357. <https://doi.org/10.1038/ncomms14357>.
11. Jia, P., Zhao, Z., Hulgán, T., Bush, W.S., Samuels, D.C., Bloss, C.S., Heaton, R.K., Ellis, R.J., Schork, N., Marra, C.M., et al. (2017). Genome-wide association study of HIV-associated neurocognitive disorder (HAND): A CHARTER group study. *Am J Med Genet B Neuropsychiatr Genet* 174, 413–426. <https://doi.org/10.1002/ajmg.b.32530>.

## Supplementary data : Effects of gene dosage on cognitive ability: A function-based association study across brain and non-brain processes

12. Shaffer, J.R., Li, J., Lee, M.K., Roosenboom, J., Orlova, E., Adhikari, K., 23andMe Research Team, Gallo, C., Poletti, G., Schuler-Faccini, L., et al. (2017). Multiethnic GWAS Reveals Polygenic Architecture of Earlobe Attachment. *Am J Hum Genet* *101*, 913–924. <https://doi.org/10.1016/j.ajhg.2017.10.001>.
13. Haaland, Ø.A., Lie, R.T., Romanowska, J., Gjerdevik, M., Gjessing, H.K., and Jugessur, A. (2018). A Genome-Wide Search for Gene-Environment Effects in Isolated Cleft Lip with or without Cleft Palate Triads Points to an Interaction between Maternal Periconceptional Vitamin Use and Variants in *ESRRG*. *Front Genet* *9*, 60. <https://doi.org/10.3389/fgene.2018.00060>.
14. Davies, G., Lam, M., Harris, S.E., Trampush, J.W., Luciano, M., Hill, W.D., Hagenaars, S.P., Ritchie, S.J., Marioni, R.E., Fawns-Ritchie, C., et al. (2018). Study of 300,486 individuals identifies 148 independent genetic loci influencing general cognitive function. *Nat Commun* *9*, 2098. <https://doi.org/10.1038/s41467-018-04362-x>.
15. Sun, B.B., Maranville, J.C., Peters, J.E., Stacey, D., Staley, J.R., Blackshaw, J., Burgess, S., Jiang, T., Paige, E., Surendran, P., et al. (2018). Genomic atlas of the human plasma proteome. *Nature* *558*, 73–79. <https://doi.org/10.1038/s41586-018-0175-2>.
16. Endo, C., Johnson, T.A., Morino, R., Nakazono, K., Kamitsuji, S., Akita, M., Kawajiri, M., Yamasaki, T., Kami, A., Hoshi, Y., et al. (2018). Genome-wide association study in Japanese females identifies fifteen novel skin-related trait associations. *Sci Rep* *8*, 8974. <https://doi.org/10.1038/s41598-018-27145-2>.
17. Lee, J.J., Wedow, R., Okbay, A., Kong, E., Maghzian, O., Zacher, M., Nguyen-Viet, T.A., Bowers, P., Sidorenko, J., Karlsson Linnér, R., et al. (2018). Gene discovery and polygenic prediction from a genome-wide association study of educational attainment in 1.1 million individuals. *Nat Genet* *50*, 1112–1121. <https://doi.org/10.1038/s41588-018-0147-3>.
18. Wyss, A.B., Sofer, T., Lee, M.K., Terzikhan, N., Nguyen, J.N., Lahousse, L., Latourelle, J.C., Smith, A.V., Bartz, T.M., Feitosa, M.F., et al. (2018). Multiethnic meta-analysis identifies ancestry-specific and cross-ancestry loci for pulmonary function. *Nat Commun* *9*, 2976. <https://doi.org/10.1038/s41467-018-05369-0>.
19. Emilsson, V., Ilkov, M., Lamb, J.R., Finkel, N., Gudmundsson, E.F., Pitts, R., Hoover, H., Gudmundsdottir, V., Horman, S.R., Aspelund, T., et al. (2018). Co-regulatory networks of human serum proteins link genetics to disease. *Science* *361*, 769–773. <https://doi.org/10.1126/science.aag1327>.
20. Yap, C.X., Sidorenko, J., Wu, Y., Kemper, K.E., Yang, J., Wray, N.R., Robinson, M.R., and Visscher, P.M. (2018). Dissection of genetic variation and evidence for pleiotropy in male pattern baldness. *Nat Commun* *9*, 5407. <https://doi.org/10.1038/s41467-018-07862-y>.
21. Whitfield, J.B., Zhu, G., Madden, P.A.F., Montgomery, G.W., Heath, A.C., and Martin, N.G. (2019). Biomarker and Genomic Risk Factors for Liver Function Test Abnormality in Hazardous Drinkers. *Alcohol Clin Exp Res* *43*, 473–482. <https://doi.org/10.1111/acer.13949>.
22. Kichaev, G., Bhatia, G., Loh, P.-R., Gazal, S., Burch, K., Freund, M.K., Schoech, A., Pasaniuc, B., and Price, A.L. (2019). Leveraging Polygenic Functional Enrichment to Improve GWAS Power. *Am J Hum Genet* *104*, 65–75. <https://doi.org/10.1016/j.ajhg.2018.11.008>.
23. Morris, J.A., Kemp, J.P., Youtten, S.E., Laurent, L., Logan, J.G., Chai, R.C., Vulpescu, N.A., Forgetta, V., Kleinman, A., Mohanty, S.T., et al. (2019). An atlas of genetic influences on osteoporosis in humans and mice. *Nat Genet* *51*, 258–266. <https://doi.org/10.1038/s41588-018-0302-x>.
24. Gialluisi, A., Andlauer, T.F.M., Mirza-Schreiber, N., Moll, K., Becker, J., Hoffmann, P., Ludwig, K.U., Czamara, D., St Pourcain, B., Brandler, W., et al. (2019). Genome-wide association scan identifies new variants associated with a cognitive predictor of dyslexia. *Transl Psychiatry* *9*, 77. <https://doi.org/10.1038/s41398-019-0402-0>.
25. Ivarsdottir, E.V., Benonisdottir, S., Thorleifsson, G., Sulem, P., Oddsson, A.,

## Supplementary data : Effects of gene dosage on cognitive ability: A function-based association study across brain and non-brain processes

- Styrkarsdottir, U., Kristmundsdottir, S., Arnadottir, G.A., Thorgeirsson, G., Jonsdottir, I., et al. (2019). Sequence variation at ANAPC1 accounts for 24% of the variability in corneal endothelial cell density. *Nat Commun* *10*, 1284. <https://doi.org/10.1038/s41467-019-09304-9>.
26. Coltell, O., Sorlí, J.V., Asensio, E.M., Fernández-Carrión, R., Barragán, R., Ortega-Azorín, C., Estruch, R., González, J.I., Salas-Salvadó, J., Lamon-Fava, S., et al. (2019). Association between taste perception and adiposity in overweight or obese older subjects with metabolic syndrome and identification of novel taste-related genes. *Am J Clin Nutr* *109*, 1709–1723. <https://doi.org/10.1093/ajcn/nqz038>.
  27. Akiyama, M., Ishigaki, K., Sakaue, S., Momozawa, Y., Horikoshi, M., Hirata, M., Matsuda, K., Ikegawa, S., Takahashi, A., Kanai, M., et al. (2019). Characterizing rare and low-frequency height-associated variants in the Japanese population. *Nat Commun* *10*, 4393. <https://doi.org/10.1038/s41467-019-12276-5>.
  28. Zhu, Z., Guo, Y., Shi, H., Liu, C.-L., Panganiban, R.A., Chung, W., O'Connor, L.J., Himes, B.E., Gazal, S., Hasegawa, K., et al. (2020). Shared genetic and experimental links between obesity-related traits and asthma subtypes in UK Biobank. *J Allergy Clin Immunol* *145*, 537–549. <https://doi.org/10.1016/j.jaci.2019.09.035>.
  29. Liu, C., and Yu, J. (2019). Genome-Wide Association Studies for Cerebrospinal Fluid Soluble TREM2 in Alzheimer's Disease. *Front Aging Neurosci* *11*, 297. <https://doi.org/10.3389/fnagi.2019.00297>.
  30. Alic, L., Papac-Milicevic, N., Czamara, D., Rudnick, R.B., Ozsvár-Kozma, M., Hartmann, A., Gurbisz, M., Hoermann, G., Haslinger-Hutter, S., Zipfel, P.F., et al. (2020). A genome-wide association study identifies key modulators of complement factor H binding to malondialdehyde-epitopes. *Proc Natl Acad Sci U S A* *117*, 9942–9951. <https://doi.org/10.1073/pnas.1913970117>.
  31. Qian, H., Kowalski, M.H., Kramer, H.J., Tao, R., Lash, J.P., Stilp, A.M., Cai, J., Li, Y., and Franceschini, N. (2020). Genome-Wide Association of Kidney Traits in Hispanics/Latinos Using Dense Imputed Whole-Genome Sequencing Data: The Hispanic Community Health Study/Study of Latinos. *Circ Genom Precis Med* *13*, e002891. <https://doi.org/10.1161/CIRCGEN.119.002891>.
  32. Wu, Y., Cao, H., Baranova, A., Huang, H., Li, S., Cai, L., Rao, S., Dai, M., Xie, M., Dou, Y., et al. (2020). Multi-trait analysis for genome-wide association study of five psychiatric disorders. *Transl Psychiatry* *10*, 1–11. <https://doi.org/10.1038/s41398-020-00902-6>.
  33. van der Meer, D., Frei, O., Kaufmann, T., Shadrin, A.A., Devor, A., Smeland, O.B., Thompson, W.K., Fan, C.C., Holland, D., Westlye, L.T., et al. (2020). Understanding the genetic determinants of the brain with MOSTest. *Nat Commun* *11*, 3512. <https://doi.org/10.1038/s41467-020-17368-1>.
  34. Chen, M.-H., Raffield, L.M., Mousas, A., Sakaue, S., Huffman, J.E., Moscati, A., Trivedi, B., Jiang, T., Akbari, P., Vuckovic, D., et al. (2020). Trans-ethnic and Ancestry-Specific Blood-Cell Genetics in 746,667 Individuals from 5 Global Populations. *Cell* *182*, 1198–1213.e14. <https://doi.org/10.1016/j.cell.2020.06.045>.
  35. Cuellar-Partida, G., Tung, J.Y., Eriksson, N., Albrecht, E., Aliev, F., Andreassen, O.A., Barroso, I., Beckmann, J.S., Boks, M.P., Boomsma, D.I., et al. (2021). Genome-wide association study identifies 48 common genetic variants associated with handedness. *Nat Hum Behav* *5*, 59–70. <https://doi.org/10.1038/s41562-020-00956-y>.
  36. Tideman, J.W.L., Pärssinen, O., Haarman, A.E.G., Khawaja, A.P., Wedenoja, J., Williams, K.M., Biino, G., Ding, X., Kähönen, M., Lehtimäki, T., et al. (2021). Evaluation of Shared Genetic Susceptibility to High and Low Myopia and Hyperopia. *JAMA Ophthalmol* *139*, 601–609. <https://doi.org/10.1001/jamaophthalmol.2021.0497>.
  37. Shelton, J.F., Shastri, A.J., Ye, C., Weldon, C.H., Filshteyn-Sonmez, T., Coker, D., Symons, A., Esparza-Gordillo, J., 23andMe COVID-19 Team, Aslibekyan, S., et al. (2021). Trans-ancestry analysis reveals genetic and nongenetic associations with COVID-19 susceptibility and severity. *Nat Genet* *53*, 801–808.

## Supplementary data : Effects of gene dosage on cognitive ability: A function-based association study across brain and non-brain processes

- <https://doi.org/10.1038/s41588-021-00854-7>.
38. Yao, Y., Chu, X., Ma, M., Ye, J., Wen, Y., Li, P., Cheng, B., Cheng, S., Zhang, L., Liu, L., et al. (2021). Evaluate the effects of serum urate level on bone mineral density: a genome-wide gene-environment interaction analysis in UK Biobank cohort. *Endocrine* 73, 702–711. <https://doi.org/10.1007/s12020-021-02760-8>.
  39. Cipriani, V., Tierney, A., Griffiths, J.R., Zuber, V., Sergouniotis, P.I., Yates, J.R.W., Moore, A.T., Bishop, P.N., Clark, S.J., and Unwin, R.D. (2021). Beyond factor H: The impact of genetic-risk variants for age-related macular degeneration on circulating factor-H-like 1 and factor-H-related protein concentrations. *Am J Hum Genet* 108, 1385–1400. <https://doi.org/10.1016/j.ajhg.2021.05.015>.
  40. Inoue, Y., Hasebe, Y., Igarashi, T., Kawagishi-Hotta, M., Okuno, R., Yamada, T., and Hasegawa, S. (2021). Search for genetic loci involved in the constitution and skin type of a Japanese women using a genome-wide association study. *Exp Dermatol* 30, 1787–1793. <https://doi.org/10.1111/exd.14430>.
  41. Shadrin, A.A., Kaufmann, T., van der Meer, D., Palmer, C.E., Makowski, C., Loughnan, R., Jernigan, T.L., Seibert, T.M., Hagler, D.J., Smeland, O.B., et al. (2021). Vertex-wise multivariate genome-wide association study identifies 780 unique genetic loci associated with cortical morphology. *Neuroimage* 244, 118603. <https://doi.org/10.1016/j.neuroimage.2021.118603>.
  42. Sakaue, S., Kanai, M., Tanigawa, Y., Karjalainen, J., Kurki, M., Koshiba, S., Narita, A., Konuma, T., Yamamoto, K., Akiyama, M., et al. (2021). A cross-population atlas of genetic associations for 220 human phenotypes. *Nat Genet* 53, 1415–1424. <https://doi.org/10.1038/s41588-021-00931-x>.
  43. Jiang, L., Zheng, Z., Fang, H., and Yang, J. (2021). A generalized linear mixed model association tool for biobank-scale data. *Nat Genet* 53, 1616–1621. <https://doi.org/10.1038/s41588-021-00954-4>.
  44. van der Meer, D., Kaufmann, T., Shadrin, A.A., Makowski, C., Frei, O., Roelfs, D., Monereo-Sánchez, J., Linden, D.E.J., Rokicki, J., Alnæs, D., et al. (2021). The genetic architecture of human cortical folding. *Science Advances* 7, eabj9446. <https://doi.org/10.1126/sciadv.abj9446>.
  45. Gudjonsson, A., Gudmundsdottir, V., Axelsson, G.T., Gudmundsson, E.F., Jonsson, B.G., Launer, L.J., Lamb, J.R., Jennings, L.L., Aspelund, T., Emilsson, V., et al. (2022). A genome-wide association study of serum proteins reveals shared loci with common diseases. *Nat Commun* 13, 480. <https://doi.org/10.1038/s41467-021-27850-z>.
  46. Mitchell, B.L., Saklatvala, J.R., Dand, N., Hagenbeek, F.A., Li, X., Min, J.L., Thomas, L., Bartels, M., Jan Hottenga, J., Lupton, M.K., et al. (2022). Genome-wide association meta-analysis identifies 29 new acne susceptibility loci. *Nat Commun* 13, 702. <https://doi.org/10.1038/s41467-022-28252-5>.
  47. Lyall, D.M., Cullen, B., Allerhand, M., Smith, D.J., Mackay, D., Evans, J., Anderson, J., Fawns-Ritchie, C., McIntosh, A.M., Deary, I.J., et al. (2016). Cognitive Test Scores in UK Biobank: Data Reduction in 480,416 Participants and Longitudinal Stability in 20,346 Participants. *PLOS ONE* 11, e0154222. <https://doi.org/10.1371/journal.pone.0154222>.
  48. Koopmans, F., van Nierop, P., Andres-Alonso, M., Byrnes, A., Cijssouw, T., Coba, M.P., Cornelisse, L.N., Farrell, R.J., Goldschmidt, H.L., Howrigan, D.P., et al. (2019). SynGO: an evidence-based, expert-curated knowledgebase for the synapse. *Neuron* 103, 217–234.e4. <https://doi.org/10.1016/j.neuron.2019.05.002>.
  49. Supek, F., Bošnjak, M., Škunca, N., and Šmuc, T. (2011). REVIGO Summarizes and Visualizes Long Lists of Gene Ontology Terms. *PLOS ONE* 6, e21800. <https://doi.org/10.1371/journal.pone.0021800>.
